# Supplementary material for: Interpreting population and family-based genome-wide association studies in the presence of confounding
Source: PubMed Central journal article supplement (PMC10002712; doi:10.1101/2023.02.26.530052), 2023-02-27
Supplement: NIHPP2023.02.26.530052v1-supplement-1.pdf [file NIHPP2023.02.26.530052v1-supplement-1.pdf]

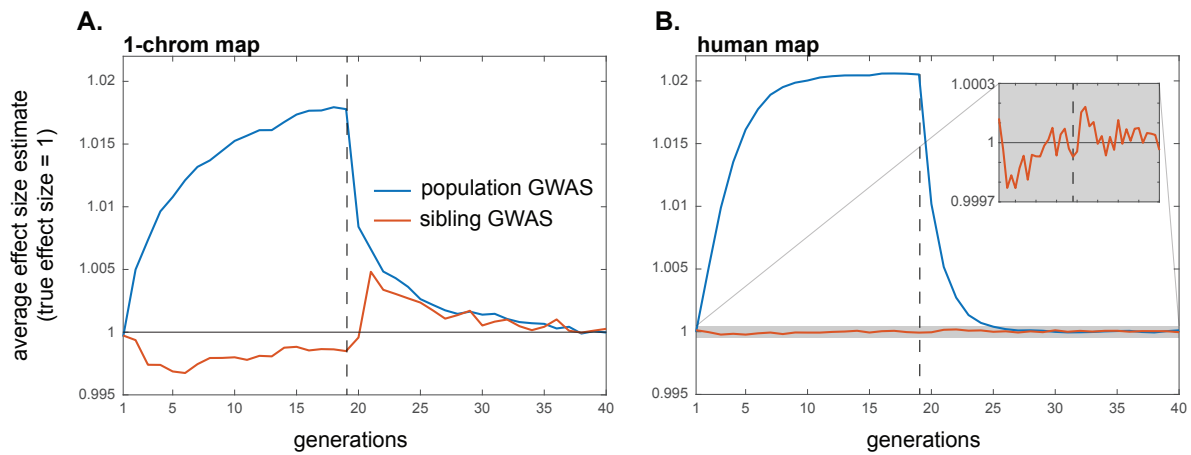

**Figure S1:** Cross-trait assortative mating influences effect size estimates at loci that affect the study trait, although this influence is second-order relative to that on effect size estimates at loci that do not affect the study trait but do affect the other trait involved in assortative mating (note the scale of the y-axis). Simulations are the same as in Fig. 2.
